# Supplementary material
Source: PubMed Central journal article supplement (PMC8846483)
Supplement: aac.01983-21-s0001.pdf [file aac.01983-21-s0001.pdf]

SUPPLEMENTARY FIGURE

**High prevalence of OXA-23-producing *Proteus mirabilis* among amoxicillin-clavulanate resistant isolates in France**

**Figure S1.** Archetypal antibiogram of OXA-23-producing *P. mirabilis*

**OXA-23-producing *P. mirabilis***

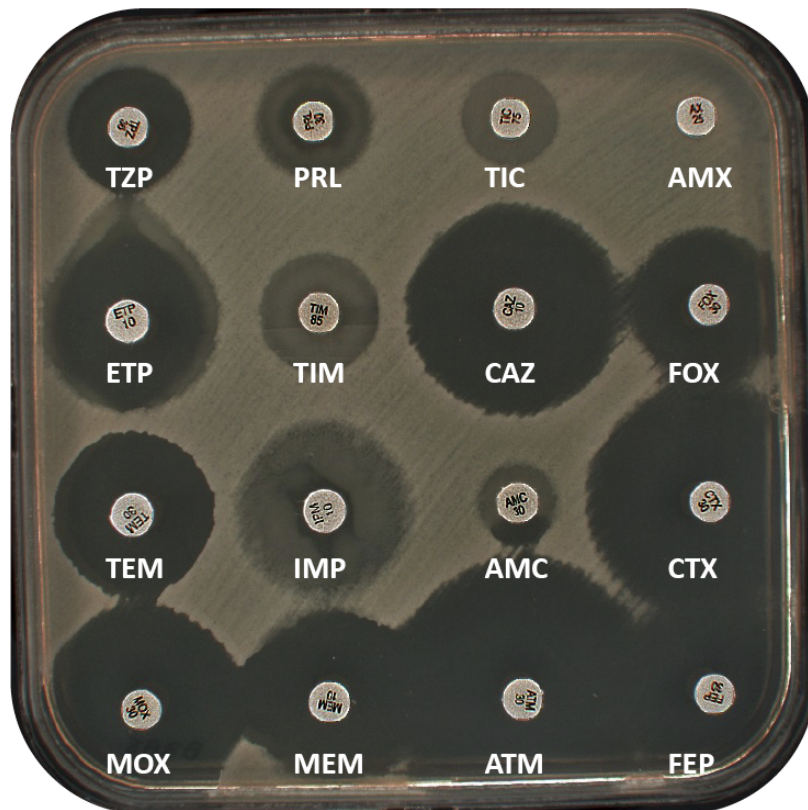

TZP, Piperacillin-tazobactam; PRL, Piperacillin; TIC, Ticarcillin; AMX, Amoxicillin; ETP, Ertapenem; TIM, Ticarcillin-clavulanate; CAZ, Ceftazidime; FOX, Cefoxitin; TEM, Temocillin; IMP, Imipenem; AMC, Amoxicillin-clavulanate; CTX, Cefotaxime ; MOX, Moxalactam; MEM, Meropenem; ATM, Aztreonam; FEP, Cefepime
